# Supplementary material for: Involvement of the Autophagy Protein Atg1 in Development and Virulence in Botryosphaeria dothidea
Source: MDPI journal article supplement (doi:10.3390/jof8090904), 2022-08-26
Supplement: s1 [file s1]

**Table S1.** PCR primers used in this study

| Primer                   | Sequence (5'-3')                                                                                                 | Relevant characteristics                                                                                                 |
|--------------------------|------------------------------------------------------------------------------------------------------------------|--------------------------------------------------------------------------------------------------------------------------|
| P1<br>P2                 | CGAGATCGCCAGGTCACGTG<br>CAAAATAGGCATTGATGTGTTGACCTCCGTGCGACGGGTGTGTTGGAG                                         | PCR primers to amplify <i>BdATG1</i> upstream fragment for construction of the <i>BdATG1</i> deletion fragment           |
| P3<br>P4                 | CTCGTCCGAGGGCAAAGGAATAGAGTAGCAGTTCAACCATGGCTCGTC<br>CGATCTTCCAGCACTCCGAG                                         | PCR primers to amplify <i>BdATG1</i> downstream fragment for construction of the <i>BdATG1</i> deletion fragment         |
| P5<br>P6                 | GCAGAGCGCTCGTATGTG<br>GCTGCAGGGTAACTAACTC                                                                        | PCR primers to amplify the <i>BdATG1</i> deletion fragment for generation of the <i>BdATG1</i> deletion mutants          |
| P7<br>P8                 | CCATCAACCTCGTCGCTGC<br>CCGTACCATGAACTGATGC                                                                       | PCR primers for identification of <i>BdATG1</i> deletion mutants                                                         |
| Probe-F<br>Probe-R       | GACAGGCAGACGTGCAGAC<br>GGCAGTGATGTGGGACATG                                                                       | PCR primers to amplify the <i>BdATG1</i> upstream fragment used as the probe for Southern blotting analysis              |
| ATG1-GFP-F<br>ATG1-GFP-R | ACTCACTATAGGGCGAATTGGGTACTCAAATTGGTTCGAACCGGTGATCTGAAC<br>CACCACCCCGGTGAACAGCTCCTCGCCCTTGCTCACGCGAGGCGATGCGTTGGC | PCR primers to amplify the native promoter and open reading frame of <i>BdATG1</i> to construct BdATG1-GFP fusion vector |
| ATG1-ID-F<br>GFP-ID-R    | CGTATGCTTGAGGCAATC<br>GTGCTGCTTCATGTGGTC                                                                         | PCR primers for PYF11-BdATG1-GFP vector identification                                                                   |
| H1-GFP-F<br>H1-GFP-R     | ACTCACTATAGGGCGAATTGGGTACTCAAATTGGTTGACAACACTCGATCAAGTC<br>CACCACCCCGGTGAACAGCTCCTCGCCCTTGCTCAGCCTTGGCCTCGGCCTC  | PCR primers to amplify the native promoter and open reading frame of <i>BdH1</i> to construct BdH1-GFP fusion vector     |
| H1-ID-F<br>GFP-ID-R      | CTGCTGTACGTTTAGACG<br>GGCATGGCGGACTTGAAG                                                                         | PCR primers for PYF11-BdH1-GFP vector identification                                                                     |

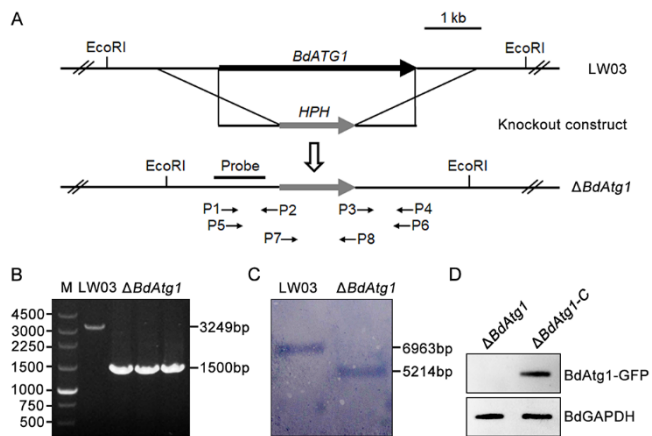

**Figure S1:** Target deletion of *BdATG1* in *B. dothidea*

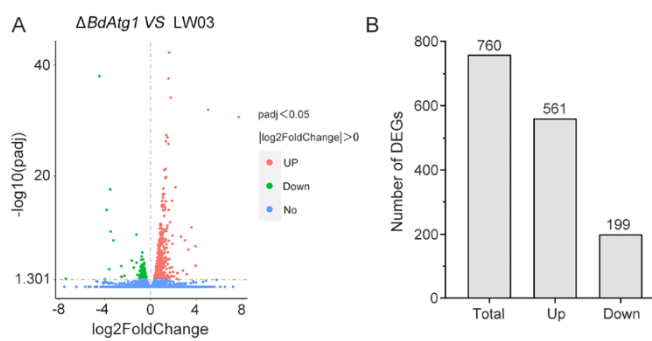

**Figure S2:** Differentially expressed genes (DEGs) of transcriptome sequencing
